# Supplementary material for: l-Arginine Enhances Resistance against Oxidative Stress and Heat Stress in Caenorhabditis elegans
Source: MDPI journal article supplement (doi:10.3390/ijerph13100969), 2016-09-29
Supplement: s1 [file s1]

# Supplementary Materials: L-Arginine Enhances Resistance against Oxidative Stress and Heat Stress in *Caenorhabditis elegans*

Heran Ma, Yudan Ma, Zhixian Zhang, Ziyuan Zhao, Ran Lin, Jinming Zhu, Yi Guo and Li Xu

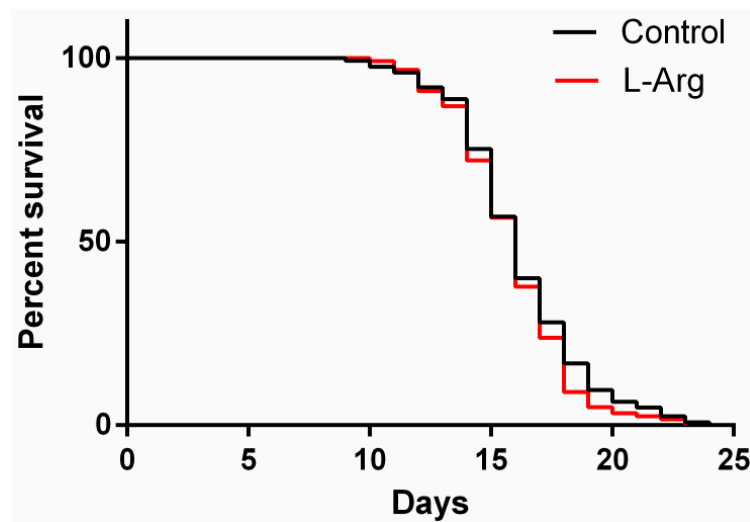

Figure S1. Lifespan experiment showing the effect of L-Arg on wild type *C. elegans* N2.

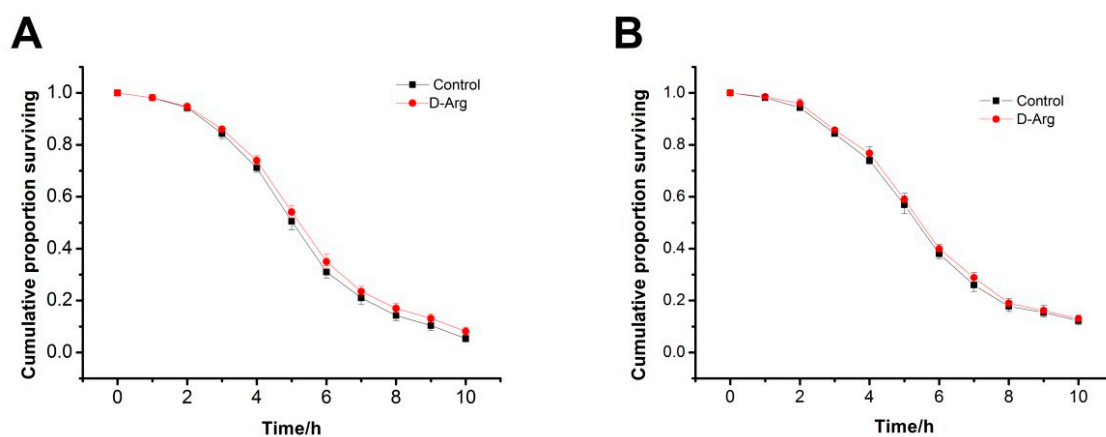

Figure S2. D-Arg does not enhance the resistance of *C. elegans* under stress conditions. (A) D-Arg (1 mM) does not affect the longevity of wild type *C. elegans* N2 under oxidative stress; (B) D-Arg (1 mM) does not affect the longevity of wild type *C. elegans* N2 under heat stress.

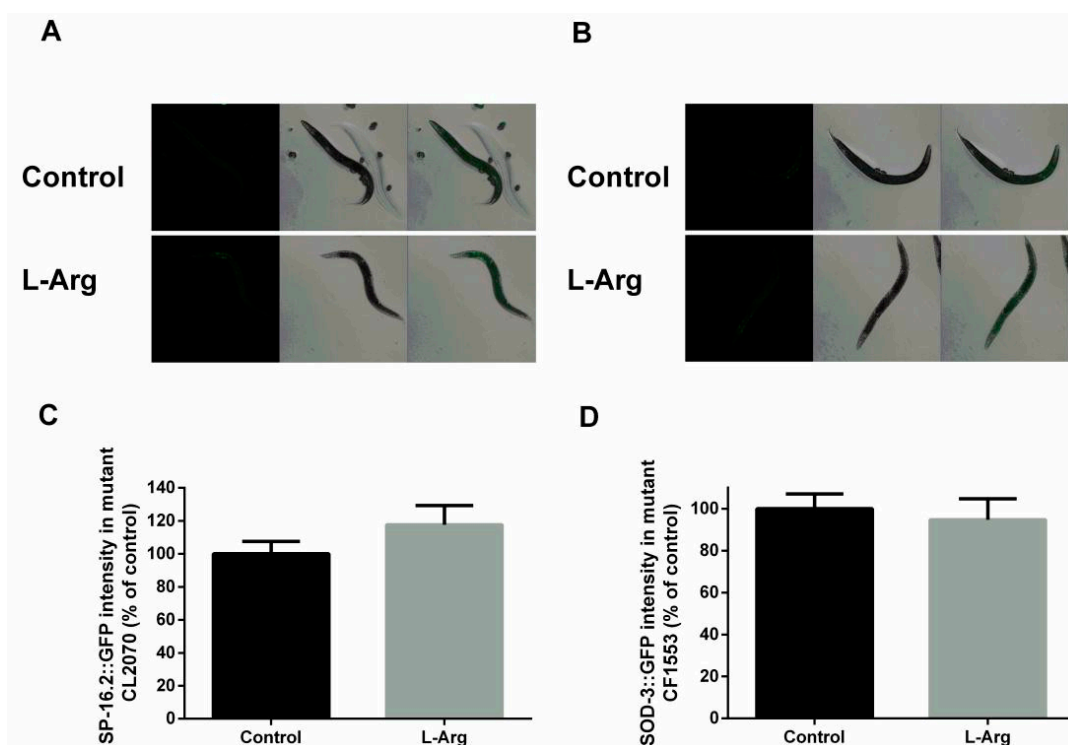

**Figure S3.** The regulatory effect of L-Arg on HSP-16.2::GFP and SOD-3::GFP in mutant worms. (A) Images of HSP-16.2::GFP expression in L-Arg-treated and control worms; (B) Images of SOD-3::GFP expression in L-Arg-treated and control worms; (C) Quantitative fluorescence analysis in transgenic CL2070 worms; (D) Quantitative fluorescence analysis in transgenic CF1553 worms. The data are presented as the mean  $\pm$  SE.

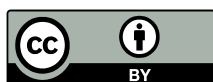

© 2016 by the authors. Submitted for possible open access publication under the terms and conditions of the Creative Commons Attribution (CC-BY) license (<http://creativecommons.org/licenses/by/4.0/>).
